# Supplementary material
Source: PubMed Central journal article supplement (PMC6663081)
Supplement: NIHMS1030301-supplement-Suppl_Table_22.pdf [file NIHMS1030301-supplement-Suppl_Table_22.pdf]

**Supplementary Table 22. Fox SNPs identified using dog genome as a reference.**

|                                                                        |            |
|------------------------------------------------------------------------|------------|
| Total number of variants identified<br>(dog-fox variants and fox SNPs) | 54,948,675 |
| Dog-fox variants                                                       | 42,421,292 |
| Fox SNPs before filtering                                              | 12,527,383 |
| Fox SNPs after filtering                                               | 7,664,181  |
